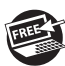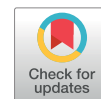

## Issues and Events

### PROFESSIONAL EDUCATION

The American Diabetes Association offers a variety of continuing education opportunities and materials for health care professionals. Educational offerings include live and free online programs. For more information, including a complete list of American Diabetes Association programs, please visit [professional.diabetes.org/ce](http://professional.diabetes.org/ce).

### SCIENTIFIC SESSIONS

The 77th annual American Diabetes Association Scientific Sessions will be held in San Diego, California, on 9–13 June 2017, at the San Diego Convention Center. The largest of its kind, this meeting brings together scientists and health care professionals from around the world who are involved in diabetes research and care. Attendees choose from over 3,000 original presentations given by leading experts in the field. For more information, please visit [scientificsessions.diabetes.org](http://scientificsessions.diabetes.org).

### DIABETES IS PRIMARY

Diabetes is Primary will be held in San Diego, California, on 9 June 2017. The American Diabetes Association will bring together health care professionals interested in the clinical management of diabetes and its complications for an innovative educational initiative developed specifically for the primary care community. This initiative will offer information and tools needed to improve patient outcomes through patient engagement. For more information, please visit <http://professional.diabetes.org/ce>.

### 32nd ANNUAL CLINICAL CONFERENCE ON DIABETES

The 32nd Annual Clinical Conference on Diabetes will be held in Orlando, Florida, on 25–28 May 2017, at Rosen Shingle Creek. It will provide a comprehensive update on the treatment of diabetes, cardiovascular disease, obesity, and comorbidities. The ADA Clinical Conference is developed specifically to provide current clinical information utilizing different teaching methods, including didactic general sessions and small-group, interactive learning opportunities. For more information, please visit <http://professional.diabetes.org/ce>.

### DIABETES STANDARDS OF MEDICAL CARE IN DIABETES—2017 WEBCAST

Presented by Robert E. Ratner, MD, FACP, FACE, former Chief Scientific and Medical Officer of the American Diabetes Association, this webcast identifies the Standards of Care recommendations to classify, diagnose, and treat prediabetes and diabetes. To access the webcast, please visit <https://ada.healthmonix.com/allcourses/home/details/2688>.

### PATHWAY TO STOP DIABETES CALL FOR NOMINATIONS

The American Diabetes Association is pleased to open the Call for Nominations for Pathway to Stop Diabetes Awards. Pathway provides substantial support to exceptional scientists who are early in their diabetes research careers or who are established in other disciplines but are interested in applying their expertise to diabetes research. Applications are due by 3 July 2017. For more information, please visit [diabetes.org/pathway](http://diabetes.org/pathway).
